# Supplementary material for: Fluorescence Properties of a Novel Cyanobacteriochrome GAF Domain from Spirulina that Exhibits Moderate Dark Reversion
Source: MDPI journal article supplement (doi:10.3390/ijms19082253), 2018-08-01
Supplement: s1 [file s1]

# Fluorescence Properties of a Novel Cyanobacteriochrome GAF Domain from *Spirulina* that Exhibits Moderate Dark Reversion

Xian-Jun Wu <sup>1,2,\*</sup>, Hong Yang <sup>1</sup>, Yi Sheng <sup>1</sup>, Yong-Li Zhu <sup>1,2</sup>, and Ping-Ping Li <sup>1,2</sup>

<sup>1</sup> College of Biology and the Environment, Nanjing Forestry University, Nanjing 210037, China; yanghong0406108@163.com (H.Y.); shengyi\_1993@163.com (Y.S.); lyly1262011@126.com (Y.-L.Z.); ppli@njfu.edu.cn (P.-P.L.)

<sup>2</sup> Collaborative Innovation Center of Sustainable Forestry in Southern China of Jiangsu Province, Nanjing Forestry University, Nanjing 210037, China

\* Correspondence: xjwu@njfu.edu.cn; tel.: +86-25-8542-7210

```

1173 ATCCGACGTTCTTTAAACCTGCAAACCATTTTTTAACACGGCGACTCAAGAAGTGCGGCAG
392 I R R S L N L Q T I F N T A T Q E V R Q

1233 GTTTTACAAGCGGAACGGGTGGTGATTACCGCTTTCTGCCGATTGGAGCGGGGAATTT
412 V L Q A E R V V I Y R F L P D W S G E F

1293 ATGGCGGAGTCCAAAGGGGAAGAATGGCGGACTGTGGTGGGGAAAAACTCCCCAATTATT
432 M A E S K G E E W R T V V G K N C P I I

1353 TCGGACAAACATTTGCGAGAAACTCAGGGGGGTCGCTATGCTGCCCATGAAACCTCAACA
452 S D K H L R E T Q G G R Y A A H E T S T

1413 GTTACGGATATTTATGAGGTGGGTTTTTCCCCTTGTCATCTCCAAATGTTAGAACAATTA
472 V T D I Y E V G F S P C H L Q M L E Q L

1473 CAAGCCCGGGCTTATATGATTGTTCCCATTTTTCTTGGGGGAGAATCTCTGGGGCTTGTTA
492 Q A R A Y M I V P I F L G E N L W G L L

1533 GCGGCCTATCAAAATTCGGCCCCTCGTTACTGGCAAGCTGATGAGGTGGAACCTGTTGACC
512 A A Y Q N S A P R Y W Q A D E V E L L T

1593 CAAATTGGTTCTCAGTTGGGGATGGCCATTCAACAGGGGCAATATTTGCAACAAATGCAG
532 Q I G S Q L G M A I Q Q G Q Y L Q Q M Q

1653 GCACAATCA
552 A Q S

```

**Figure S1.** Nucleotide and amino acid sequence of SPI1085(GAF3, 397-552aa) from *Spirulina subsalsa* FACHB351. The conserved cysteine-483-binding site is underlined with a solid line; the unconserved cysteine-448 residue is underlined with a wavy line, and boxes show the conserved motifs in CBCR GAF domains.

```

1      ATGGGTGTTAGTTTAGCAGAAGTGAATTTAGCCACAATGCTACGGGAAGGGACGAAAAAA
1      M  G  V  S  L  A  E  V  N  L  A  T  M  L  R  E  G  T  K  K

61     TCCCATACTATGGCGGAAAATATGGGGTTTATTAAATGTTTCCTCAAAGGCGTAGTCGAA
21     S  H  T  M  A  E  N  M  G  F  I  K  C  F  L  K  G  V  V  E

121    AAAAATTCCTACCGTAGATTAGCGGCTAATCTCTACTATGTTTATGGGGCGATGGAAGAA
41     K  N  S  Y  R  R  L  A  A  N  L  Y  Y  V  Y  G  A  M  E  E

181    GAAATGGAACGCCTCAAAGATCATCCCATTTTGTCTAAGGTCTATTTCCCTGAATTAAAT
61     E  M  E  R  L  K  D  H  P  I  L  S  K  V  Y  F  P  E  L  N

241    CGGAAAGCTAATTTAGAGCGGGATTTGTTCTATTACTACGGAGCAAACCTGGCGGGAGGAA
81     R  K  A  N  L  E  R  D  L  F  Y  Y  Y  G  A  N  W  R  E  E

301    ATTGAACTTTCTCCTACAGGTCAAGCCTATGTTAATCGCATTTCATCATGTGGCGAATGAA
101    I  E  L  S  P  T  G  Q  A  Y  V  N  R  I  H  H  V  A  N  E

361    AAGCCAGAACTCTTGGTGGCACATCTTTACACCCGCTATCTGGGGGATCTCTCTGGGGGA
121    K  P  E  L  L  V  A  H  L  Y  T  R  Y  L  G  D  L  S  G  G

421    CAAATCCTCAAGAAAATTGCTCAGACGGCGATGAATCTTTCTGAGGGTGAAGGGACGGCT
141    Q  I  L  K  K  I  A  Q  T  A  M  N  L  S  E  G  E  G  T  A

481    TTTTATCAGTTTGAGCAGATTCCCGATGAGAAGGCGTTCAAAACCCAATATCGGGCTGCA
161    F  Y  Q  F  E  Q  I  P  D  E  K  A  F  K  T  Q  Y  R  A  A

541    ATGGACAGTTTACCTGTGGATCAACAAACGGCCGAGGCTATTGTTGATGAAGCCAATGAT
181    M  D  S  L  P  V  D  Q  Q  T  A  E  A  I  V  D  E  A  N  D

601    GCGTTCGGCATGAATATGAAAATGTTTCGGAGAATTAGAAGGGGAATTTGATCAAAGCTAT
201    A  F  G  M  N  M  K  M  F  G  E  L  E  G  E  F  D  Q  S  Y

661    TGGTCAATGCTGTTTAATTCTTTAACTCGTCGTCGCAGTCGTGGGAGTACCGATGGCGAA
221    W  S  M  L  F  N  S  L  T  R  R  R  S  R  G  S  T  D  G  E

721    TTAGCCACCGCCGAATAG
241    L  A  T  A  E  *

```

**Figure S2.** Nucleotide and amino acid sequence of heme oxygenase 1 (HO1) from *Spirulina subsalsa* FACHB351. Underline indicates the ATG start codon and the TAG stop codon, and boxes show the conserved active sites.

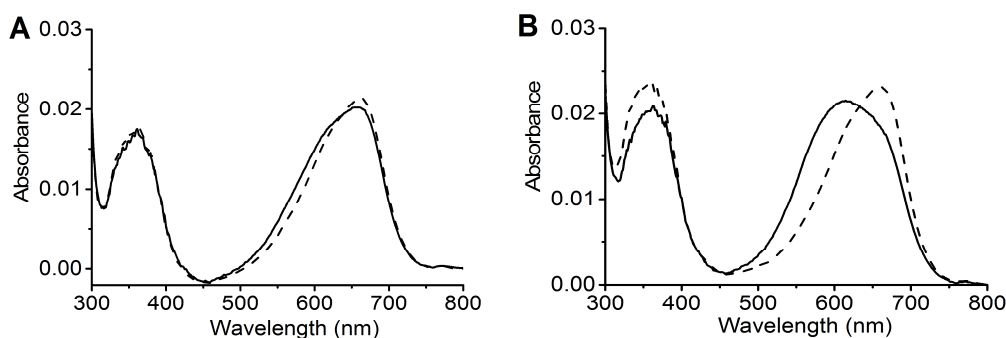

**Figure S3.** Acid denaturation of SPI1085g3. (A) Absorbance spectra of acid-denatured SPI1085g3 Pr state: absorbance spectra just after denaturation (solid line) and after while light illumination (dashed line). (B) Absorbance spectra of acid-denatured SPI1085g3 Pg state: absorbance spectra just after denaturation (solid line) and after while light illumination (dashed line).
